# Supplementary material for: CTP regulates membrane-binding activity of the nucleoid occlusion protein Noc
Source: PubMed Central journal article supplement (PMC8429893; doi:10.1016/j.molcel.2021.06.025), 2021-09-02
Supplement: mmc1.pdf [file mmc1.pdf]

**Molecular Cell, Volume 81**

**Supplemental information**

**CTP regulates membrane-binding activity  
of the nucleoid occlusion protein Noc**

**Adam S.B. Jalal, Ngat T. Tran, Ling J. Wu, Karunakaran Ramakrishnan, Martin Rejzek, Giulia Gobbato, Clare E.M. Stevenson, David M. Lawson, Jeff Errington, and Tung B.K. Le**



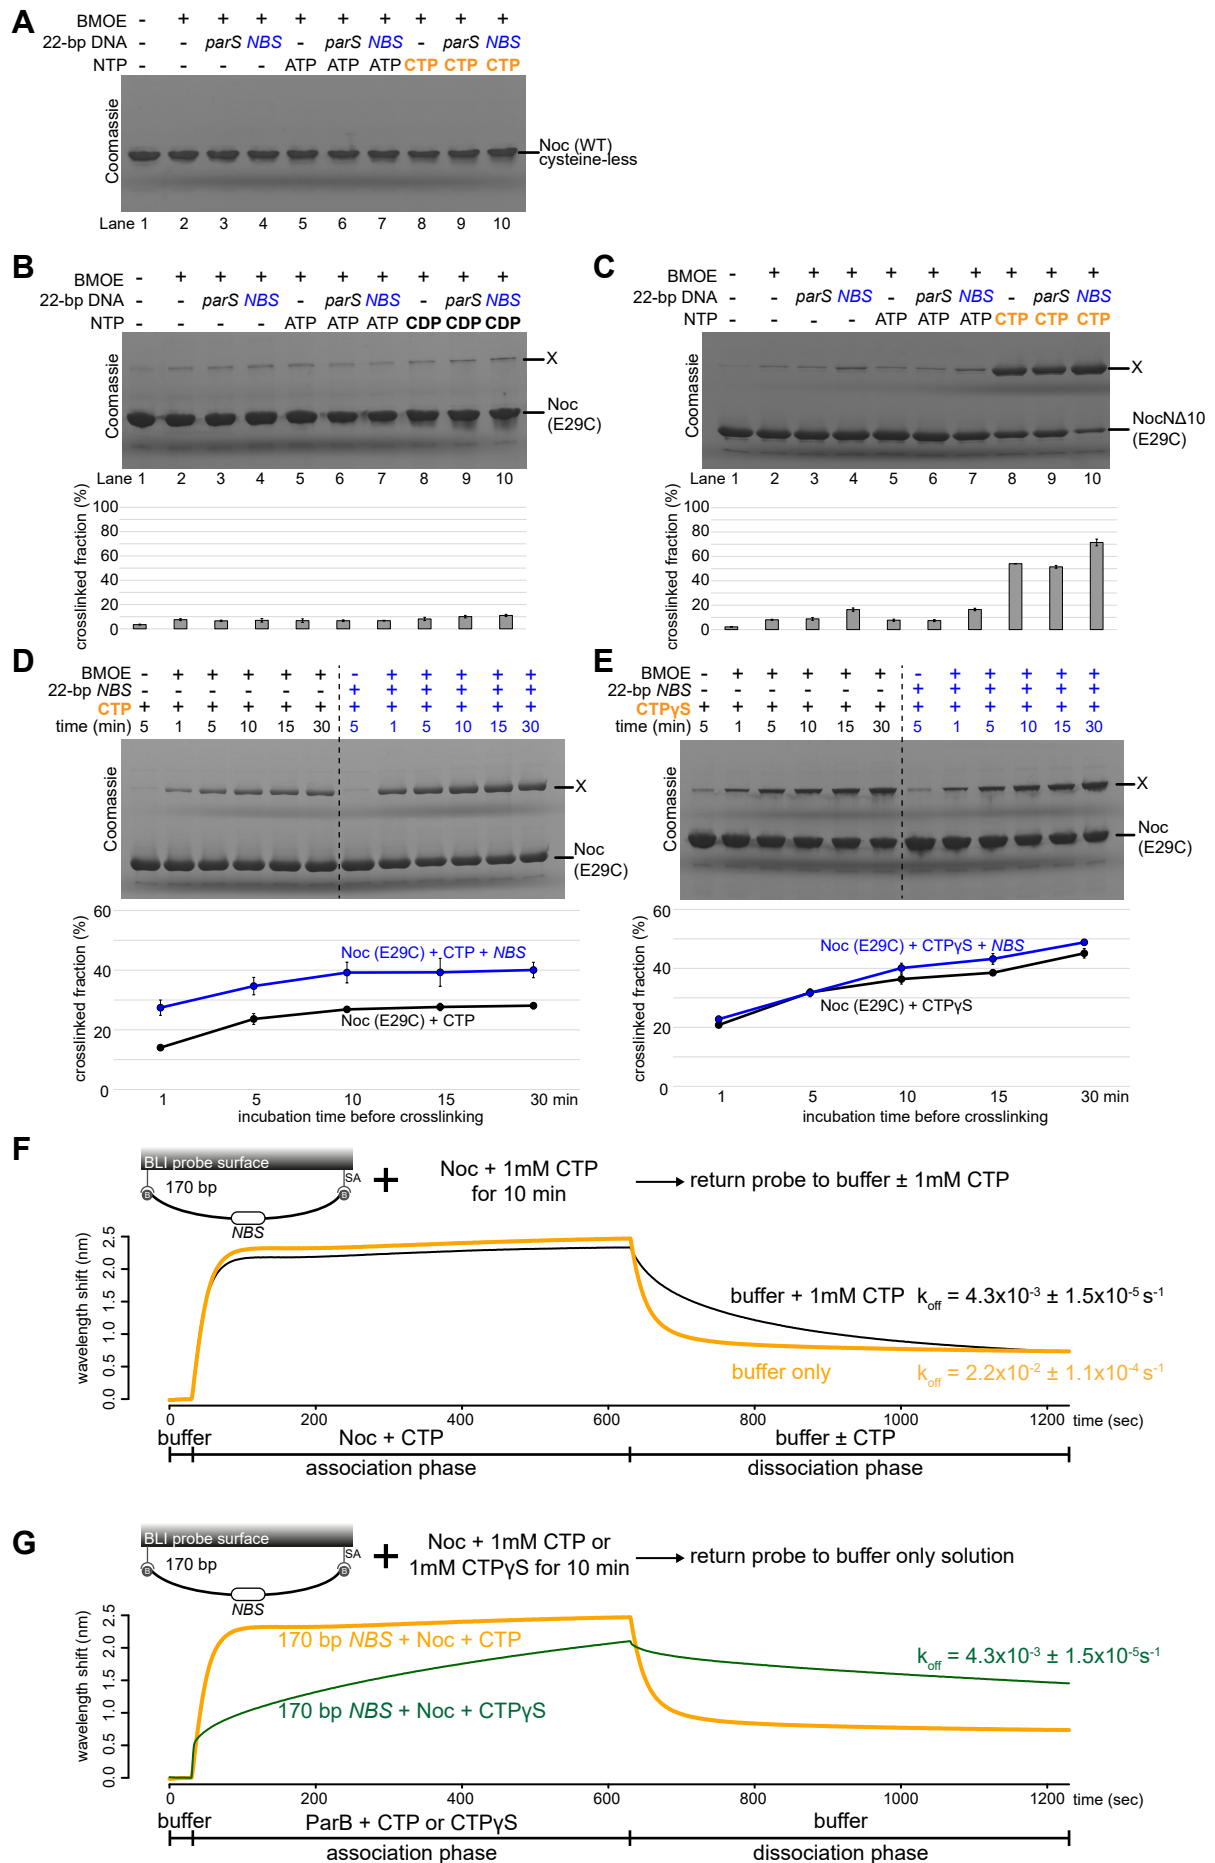

Figure legend (next page)

**Figure S2. CTP and CTPyS, but not other nucleotides, promote the engagement of the N-terminal domain of Noc, related to Figure 2.** (A) SDS-PAGE analysis of BMOE crosslinking products of 10  $\mu$ M *B. subtilis* Noc (WT) protein  $\pm$  1.0  $\mu$ M 22-bp *parS/NBS* DNA  $\pm$  1.0 mM NTP. Wild-type Noc naturally lacks cysteine, hence does not crosslink in the presence of BMOE. All crosslinking reactions were performed at 22°C unless indicated otherwise. (B) Same as panel A but Noc (E29C) was used instead. X indicates a crosslinked form of Noc (E29C). Quantification of the crosslinked fraction is shown below each representative image. Error bars represent SEM from three replicates. (C) Same as panel A, but NocN $\Delta$ 10 (E29C) was used instead. (D) Time-course of Noc (E29C) crosslinking with CTP in the presence or absence of 22-bp *NBS* DNA. Purified Noc (E29C) was preincubated with 1.0 mM CTP  $\pm$  1  $\mu$ M 22-bp *NBS* DNA for 1, 5, 10, 15, or 30 min at 4°C (instead of the usual 22°C) before BMOE was added. A lower incubation temperature was needed to slow down the reaction. Quantification of the crosslinked fraction is shown below each representative image. Error bars represent SE from three replicates. (E) Same as panel D, but 1.0 mM CTPyS was used instead. (F) BLI analysis of the interaction between *B. subtilis* Noc-CTP and a 170-bp dual biotin-labeled *NBS* DNA. For the association phase, the interaction between a premix of 1.0  $\mu$ M *B. subtilis* Noc  $\pm$  1.0 mM CTP and a 170-bp dual biotin-labeled *NBS* probe was monitored in real-time for 10 min. For the dissociation phase, the probe was returned to either a buffer-only solution or a buffer supplemented with 1mM CTP. The dissociation rate ( $k_{\text{off}}$ ) of bound Noc into buffer is shown for each reaction. (G) BLI analysis of the interaction between *B. subtilis* Noc-CTP or Noc-CTPyS and a 170-bp dual biotin-labeled *NBS* DNA. For the association phase, the interaction between a premix of 1.0  $\mu$ M *B. subtilis* Noc + 1.0 mM CTP or CTPyS and a 170-bp dual biotin-labeled *NBS* probe was monitored in real-time for 10 min. For the dissociation phase, the probe was returned to a buffer-only solution. The dissociation rate ( $k_{\text{off}}$ ) of bound Noc into buffer is shown for each reaction. Each experiment was triplicated and a representative sensorgram was shown.



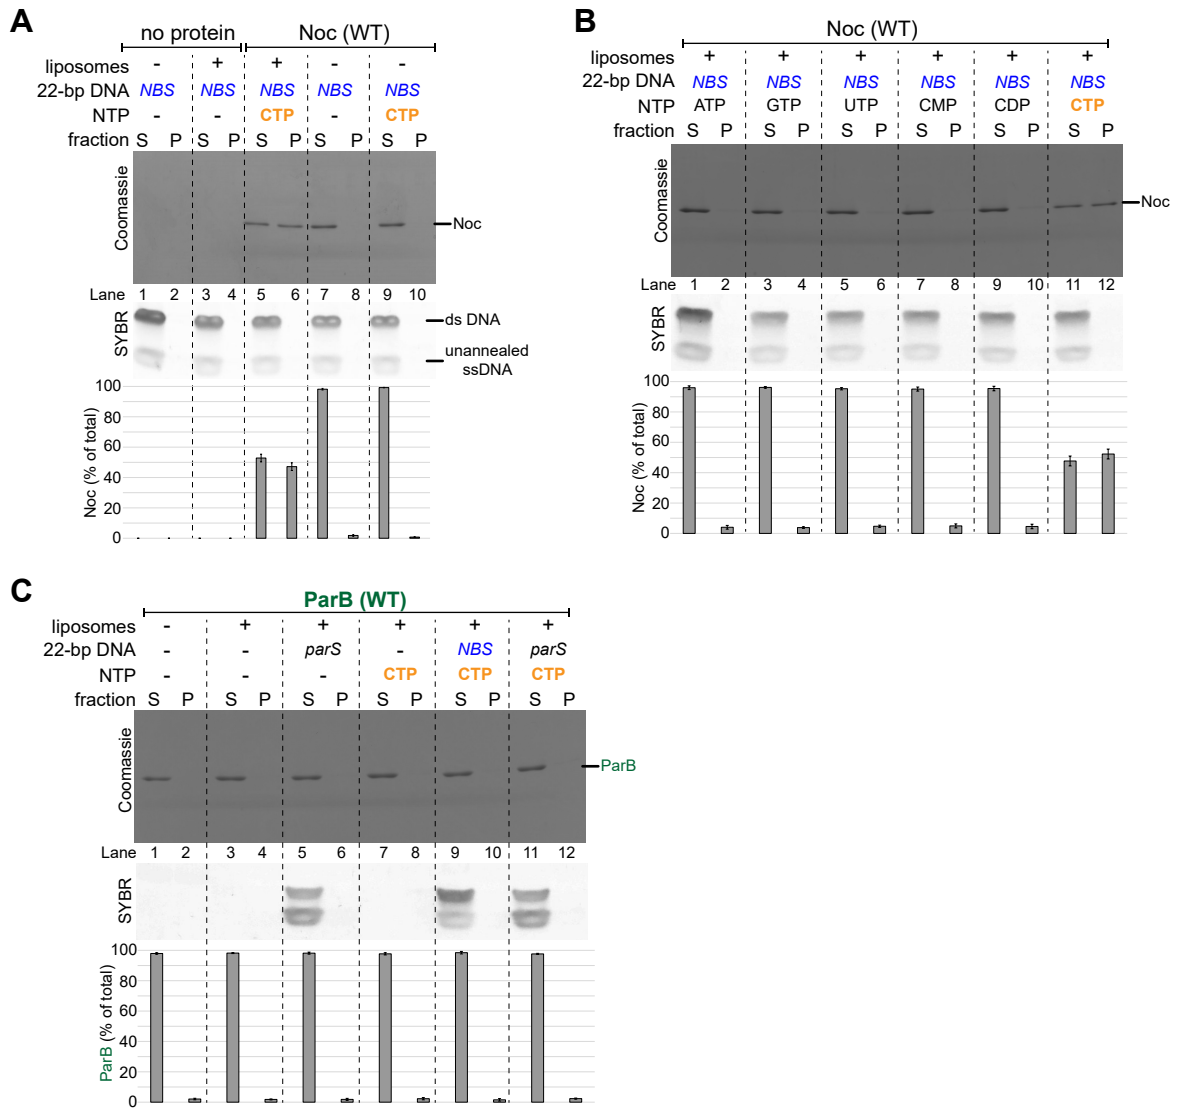

**Figure S3. CTP and NBS DNA enable Noc binding to liposomes, related to Figure 3. (A)** Analysis of *B. subtilis* Noc binding to membranes by a liposome co-sedimentation assay. A premix of 1.0  $\mu\text{M}$  22-bp linear NBS DNA  $\pm$  0.75  $\mu\text{M}$  *B. subtilis* Noc protein  $\pm$  1.0 mM CTP  $\pm$  1.0 mg/mL liposomes was incubated at 22°C before ultracentrifugation. The resulting supernatant (S) and pellet (P) fractions were analyzed by SDS-PAGE. Without Noc, 22-bp NBS DNA did not co-sediment on its own (lanes 1-2) or with liposomes (lanes 3-4). Samples were also loaded onto a 20% TBE PAGE, and the gel was subsequently stained with Sybr Green for DNA. Quantification of Noc in each fraction is shown below each representative image. Error bars represent SEM from three replicates. **(B)** CTP but no other nucleotide enables Noc to co-sediment with liposomes. A premix of 0.75  $\mu\text{M}$  *B. subtilis* Noc protein + 1.0  $\mu\text{M}$  22-bp NBS DNA  $\pm$  1.0 mM NTP + 1.0 mg/mL liposomes was incubated at 22°C for 5 min before ultracentrifugation. The resulting supernatant (S) and pellet (P) fractions were analyzed by SDS-PAGE. **(C)** *Caulobacter crescentus* ParB does not co-sediment with liposomes in any tested conditions. A premix of 0.75  $\mu\text{M}$  *C. crescentus* ParB protein  $\pm$  1.0  $\mu\text{M}$  22-bp linear parS/NBS DNA  $\pm$  1.0 mM CTP  $\pm$  1.0 mg/mL liposomes was incubated at 22°C for 5 min before ultracentrifugation. The resulting supernatant (S) and pellet (P) fractions were analyzed by SDS-PAGE.



**Figure S4. Liposome flotation assays show Noc can recruit *NBS* plasmid to the membrane in the presence of CTP, related to Figure 4. (A)** The principle of a liposome flotation assay. Liposomes ± purified Noc ± CTP ± *NBS* plasmid were incubated in a 30% sucrose binding buffer. Buffer with 25% sucrose and 0% sucrose were subsequently layered on top sequentially. After ultracentrifugation, liposomes and associated protein/DNA migrate along the sucrose gradient i.e. floating to the uppermost fractions. Three equal fractions (bottom, middle, and top) were drawn out sequentially using a Hamilton syringe, and their protein and DNA contents were analyzed. **(B)** Control experiments: liposome flotation assays in which one component, either Noc protein, a 5-kb plasmid DNA, CTP, or liposomes, was omitted. **(C)** Analysis of *B. subtilis* Noc binding to membranes and the recruitment of plasmid DNA to membranes by a liposome flotation assay. A premix of 0.75 μM *B. subtilis* Noc ± 100 nM 5-kb plasmid DNA ± 1.0 mM CTP ± 1.0 mg/mL liposomes was incubated at 22°C for 5 min before ultracentrifugation. Either an empty plasmid or an *NBS*-harboring plasmid was employed in this assay. The resulting fractions (Bottom B, Middle M, and Top T) were analyzed by SDS-PAGE. Samples were also loaded onto a 1% agarose gel and was subsequently stained with Sybr Green for DNA. Quantification of Noc or DNA in each fraction is shown below each representative image. Error bars represent SEM from three replicates. **(D)** Other Noc variants, Noc (R89A), Noc (N121S), and NocNΔ10, were also analyzed in a liposome flotation assay. A premix of 0.75 μM *B. subtilis* Noc protein (WT or mutants) + 100 nM *NBS* plasmid + 1.0 mM CTP + 1.0 mg/mL liposomes was ultracentrifuged, and the resulting fractions were analyzed for protein and DNA contents.



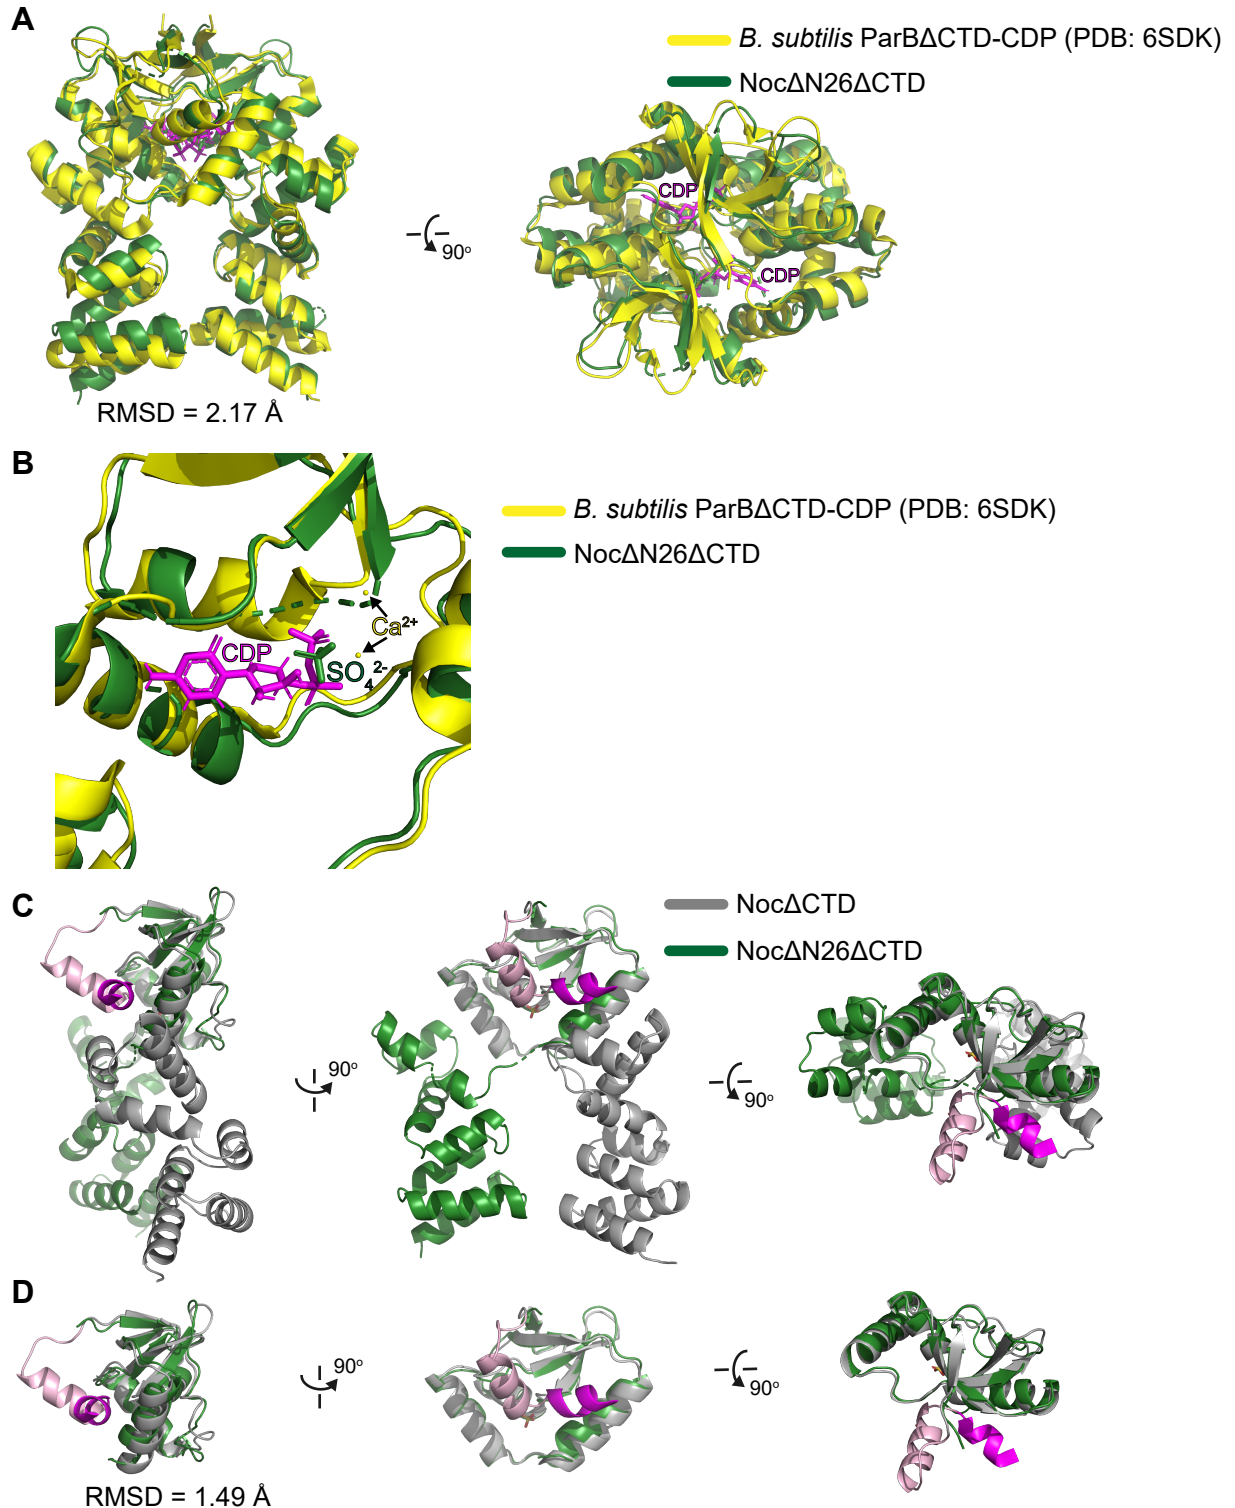

**Figure S6. The conformation of *G. thermoleovorans* NocN $\Delta$ 26 $\Delta$ CTD is similar to that of a nucleotide-bound *B. subtilis* ParB $\Delta$ CTD, related to Figure 6. (A) Superimposition between a *G. thermoleovorans* NocN $\Delta$ 26 $\Delta$ CTD dimer (green) and a *B. subtilis* ParB $\Delta$ CTD-CDP dimer (yellow, PDB: 6SDK). CDP molecules are shown in magenta. (B) Magnification of the nucleotide-binding pocket of *B. subtilis* ParB $\Delta$ CTD and *G. thermoleovorans* NocN $\Delta$ 26 $\Delta$ CTD. CDP and Ca<sup>2+</sup> cations that belong to *B. subtilis* ParB $\Delta$ CTD-CDP co-crystal structure are highlighted in magenta and yellow, respectively. In the *G. thermoleovorans* NocN $\Delta$ 26 $\Delta$ CTD structure, a sulfate ion (dark green) occupies a similar position to the  $\beta$ -phosphate group of CDP. (C) A superimposition at the N-terminal domains of a Noc $\Delta$ CTD monomer (grey) and a NocN $\Delta$ 26 $\Delta$ CTD monomer (green). The amphipathic helix  $\alpha$ 1 and helix  $\alpha$ 2 are shown in magenta and pink, respectively. (D) Same as panel B, but only the N-terminal domain (NTD) is shown for clarity.**

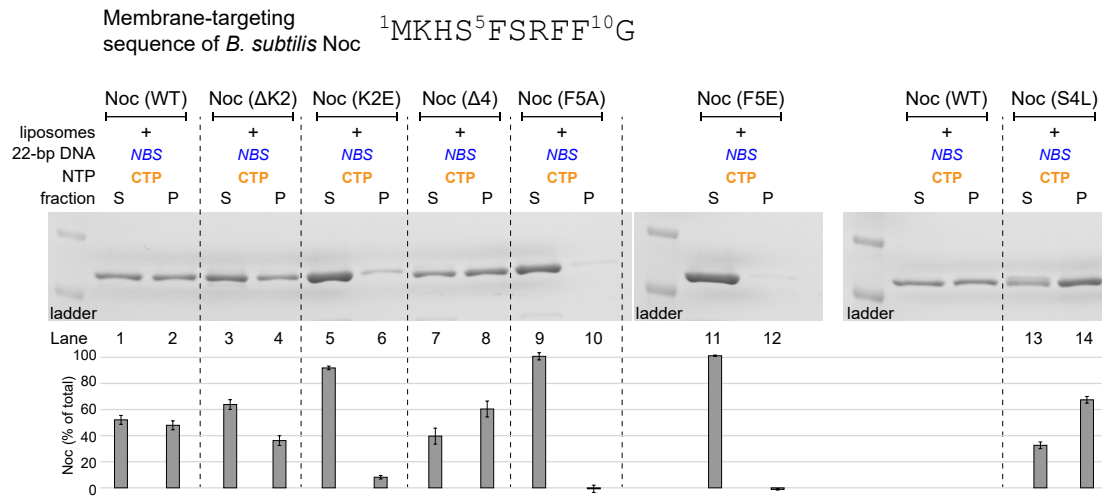

**Figure S7. Effects of N-terminal substitutions and deletions on *B. subtilis* Noc-liposomes interaction, related to Figure 6.** A premix of 1.0  $\mu\text{M}$  22-bp linear *NBS* DNA + 1.0  $\mu\text{M}$  *B. subtilis* Noc protein (WT/mutants) + 1.0 mM CTP + 1.0 mg/mL liposomes was incubated at 22°C before ultracentrifugation. The resulting supernatant (S) and pellet (P) fractions were analyzed by SDS-PAGE. Quantification of Noc in each fraction is shown below each representative image. Error bars represent SEM from three replicates.

**TABLE S1. Bacterial strains. Related to STAR Methods.**

| Strains                      | Description                                                                                                                                                   | Source               |
|------------------------------|---------------------------------------------------------------------------------------------------------------------------------------------------------------|----------------------|
| <i>E. coli</i> Rosetta (DE3) | F <sup>-</sup> <i>ompT hsdS<sub>B</sub>(r<sub>B</sub><sup>-</sup> m<sub>B</sub><sup>-</sup>) gal dcm</i> (DE3) pRARE (chloramphenicol <sup>R</sup> )          | Merck                |
| DWA117                       | <i>B. subtilis</i> 168CA ( <i>trpC2</i> ) $\Delta$ <i>noc::tet</i>                                                                                            | (Adams et al., 2015) |
| DWA206                       | <i>B. subtilis</i> 168CA ( <i>trpC2</i> ) $\Delta$ <i>noc::tet</i> $\Omega$ <i>amyE::[spc Pxyl-noc (WT)-myfp]</i>                                             | (Adams et al., 2015) |
| DWA382                       | <i>B. subtilis</i> 168CA ( <i>trpC2</i> ) $\Delta$ <i>noc::tet</i> $\Omega$ <i>amyE::[spc Pxyl-nocN<math>\Delta</math>10-myfp]</i>                            | (Adams et al., 2015) |
| DWA546                       | <i>B. subtilis</i> 168CA ( <i>trpC2</i> ) $\Delta$ <i>noc::tet</i> $\Omega$ <i>amyE::[spc Pxyl-noc (R89A)-myfp]</i>                                           | (Adams et al., 2015) |
| 4746                         | <i>B. subtilis</i> 168CA ( <i>trpC2</i> ) $\Delta$ <i>noc::tet</i> $\Omega$ <i>amyE::[spc Pxyl-noc (N121S)-yfpmut1]</i>                                       | This study           |
| DWA564                       | <i>B. subtilis</i> 168CA ( <i>trpC2</i> ) $\Delta$ <i>noc::tet</i> $\Delta$ <i>minCD::kan</i> $\Omega$ <i>amyE::[spc Pxyl-noc (WT)-myfp]</i>                  | (Adams et al., 2015) |
| DWA566                       | <i>B. subtilis</i> 168CA ( <i>trpC2</i> ) $\Delta$ <i>noc::tet</i> $\Delta$ <i>minCD::kan</i> $\Omega$ <i>amyE::[spc Pxyl-nocN<math>\Delta</math>10-myfp]</i> | (Adams et al., 2015) |
| DWA600                       | <i>B. subtilis</i> 168CA ( <i>trpC2</i> ) $\Delta$ <i>noc::tet</i> $\Delta$ <i>minCD::kan</i> $\Omega$ <i>amyE::[spc Pxyl-noc (R89A)-myfp]</i>                | (Adams et al., 2015) |
| 4747                         | <i>B. subtilis</i> 168CA ( <i>trpC2</i> ) $\Delta$ <i>noc::tet</i> $\Delta$ <i>minCD::kan</i> $\Omega$ <i>amyE::[spc Pxyl-noc (N121S)-yfpmut1]</i>            | This study           |

**TABLE S2. DNA, plasmids, and oligos. Related to STAR Methods.**

| Plasmids                                                                                    | Description                                                                                                                                                                         | Source     |
|---------------------------------------------------------------------------------------------|-------------------------------------------------------------------------------------------------------------------------------------------------------------------------------------|------------|
| pET21b:: <i>Bacillus subtilis noc-his<sub>6</sub></i>                                       | Overexpression of a C-terminally His <sub>6</sub> -tagged <i>B. subtilis</i> Noc, carbenicillin <sup>R</sup>                                                                        | This study |
| pET21b:: <i>Bacillus subtilis nocN<math>\Delta</math>10-his<sub>6</sub></i>                 | Overexpression of a C-terminally His <sub>6</sub> -tagged <i>B. subtilis</i> Noc that lacks the first 10 amino acids, carbenicillin <sup>R</sup>                                    | This study |
| pET21b:: <i>Bacillus subtilis noc (R89A)-his<sub>6</sub></i>                                | Overexpression of a C-terminally His <sub>6</sub> -tagged <i>B. subtilis</i> Noc (R89A), carbenicillin <sup>R</sup>                                                                 | This study |
| pET21b:: <i>Bacillus subtilis noc (N121S)-his<sub>6</sub></i>                               | Overexpression of a C-terminally His <sub>6</sub> -tagged <i>B. subtilis</i> Noc (N121S), carbenicillin <sup>R</sup>                                                                | This study |
| pET21b:: <i>Bacillus subtilis noc (E29C)-his<sub>6</sub></i>                                | Overexpression of a C-terminally His <sub>6</sub> -tagged <i>B. subtilis</i> Noc (E29C), carbenicillin <sup>R</sup>                                                                 | This study |
| pET21b:: <i>Bacillus subtilis noc (E29C R89A)-his<sub>6</sub></i>                           | Overexpression of a C-terminally His <sub>6</sub> -tagged <i>B. subtilis</i> Noc (E29C R89A), carbenicillin <sup>R</sup>                                                            | This study |
| pET21b:: <i>Bacillus subtilis noc (E29C N121S)-his<sub>6</sub></i>                          | Overexpression of a C-terminally His <sub>6</sub> -tagged <i>B. subtilis</i> Noc (E29C N121S), carbenicillin <sup>R</sup>                                                           | This study |
| pET21b:: <i>Bacillus subtilis noc <math>\Delta</math>K2-his<sub>6</sub></i>                 | Overexpression of a C-terminally His <sub>6</sub> -tagged <i>B. subtilis</i> Noc that lacks the lysine at position 2, carbenicillin <sup>R</sup>                                    | This study |
| pET21b:: <i>Bacillus subtilis noc <math>\Delta</math>4-his<sub>6</sub></i>                  | Overexpression of a C-terminally His <sub>6</sub> -tagged <i>B. subtilis</i> Noc that lacks the first 4 amino acids, carbenicillin <sup>R</sup>                                     | This study |
| pET21b:: <i>Bacillus subtilis noc (K2E)-his<sub>6</sub></i>                                 | Overexpression of a C-terminally His <sub>6</sub> -tagged <i>B. subtilis</i> Noc (K2E), carbenicillin <sup>R</sup>                                                                  | This study |
| pET21b:: <i>Bacillus subtilis noc (S4L)-his<sub>6</sub></i>                                 | Overexpression of a C-terminally His <sub>6</sub> -tagged <i>B. subtilis</i> Noc (S4L), carbenicillin <sup>R</sup>                                                                  | This study |
| pET21b:: <i>Bacillus subtilis noc (F5A)-his<sub>6</sub></i>                                 | Overexpression of a C-terminally His <sub>6</sub> -tagged <i>B. subtilis</i> Noc (F5A), carbenicillin <sup>R</sup>                                                                  | This study |
| pET21b:: <i>Bacillus subtilis noc (F5E)-his<sub>6</sub></i>                                 | Overexpression of a C-terminally His <sub>6</sub> -tagged <i>B. subtilis</i> Noc (F5E), carbenicillin <sup>R</sup>                                                                  | This study |
| pET21b:: <i>Bacillus subtilis nocN<math>\Delta</math>10 (E29C)-his<sub>6</sub></i>          | Overexpression of a C-terminally His <sub>6</sub> -tagged <i>B. subtilis</i> Noc (E29C) variant that also lacks the first 10 amino acids, carbenicillin <sup>R</sup>                | This study |
| pET21b:: <i>Geobacillus thermoleovorans Noc<math>\Delta</math>CTD</i>                       | Overexpression of a C-terminally His <sub>6</sub> -tagged <i>G. thermoleovorans</i> Noc that lacks the last 42 amino acids, carbenicillin <sup>R</sup>                              | This study |
| pET21b:: <i>Geobacillus thermoleovorans NocN<math>\Delta</math>26<math>\Delta</math>CTD</i> | Overexpression of a C-terminally His <sub>6</sub> -tagged <i>G. thermoleovorans</i> Noc that lacks the first 26 amino acids and the last 42 amino acids, carbenicillin <sup>R</sup> | This study |
| pMCS5-4xNBS                                                                                 | pMCS5 plasmid that harbors four NBS sites, tetracycline <sup>R</sup>                                                                                                                | This study |



|                                                      |                                                                                                                                                                                                                                                                                                                                         |                                                      |
|------------------------------------------------------|-----------------------------------------------------------------------------------------------------------------------------------------------------------------------------------------------------------------------------------------------------------------------------------------------------------------------------------------|------------------------------------------------------|
| pMCS5::empty                                         | pMCS5 plasmid with an intact multiple cloning site, tetracycline <sup>R</sup>                                                                                                                                                                                                                                                           | (Thanbichler et al., 2007)                           |
| pET21b::Caulobacter crescentus parB-his <sub>6</sub> | Overexpression of a C-terminally His <sub>6</sub> -tagged C. crescentus ParB, carbenicillin <sup>R</sup>                                                                                                                                                                                                                                | Gift from Christine Jacobs-Wagner (Lim et al., 2014) |
| pSG4926                                              | <i>bla amyE' spc P<sub>xyl</sub>-noc-yfpmut1 'amyE</i> ; shuttle plasmid harboring a xylose-inducible <i>noc-yfp</i> fusion for integration at the <i>B. subtilis amyE</i> locus                                                                                                                                                        | (Wu et al., 2009)                                    |
| pSG4926 N121S                                        | <i>bla amyE' spc P<sub>xyl</sub>-noc (N121S)-yfpmut1 'amyE</i> ; <i>B. subtilis</i> plasmid harboring a xylose-inducible <i>noc (N121S)-yfp</i> fusion for integration at the <i>B. subtilis amyE</i> locus                                                                                                                             | This study                                           |
| <b>Oligos/gBlocks</b>                                |                                                                                                                                                                                                                                                                                                                                         |                                                      |
| 170bp- <i>parS</i>                                   | CGCCAGGGTTTTCCCAGTCACGACGTTGTAAAACGACGGCCAGAATTCGCAACGTGTGTTTCACGTGAAACAGCCTTGAAGTATAACGACTCTATCATTGATAGAGTGTTCTCTCCACGGGATCCCAGGCATGCAAGCTTGGCGTAA TCATGGTCATAGCTGTTTCCT                                                                                                                                                               | (Jalal et al., 2020a)                                |
| 170bp-NBS                                            | CGCCAGGGTTTTCCCAGTCACGACGTTGTAAAACGACGGCCAGAATTCGCAACGTGTATTTCCTCCGGGAAATAGCCTTGAAGTATAACGACTCTATCATTGATAGAGTGTTCTCTCCACGGGATCCCAGGCATGCAAGCTTGGCGTAA TCATGGTCATAGCTGTTTCCT                                                                                                                                                             | This study                                           |
| 22bp- <i>parS</i>                                    | GGATGTTTCACGTGAAACATCC                                                                                                                                                                                                                                                                                                                  | (Jalal et al., 2020b)                                |
| 22bp-NBS                                             | GGATATTTCCTCCGGGAAATATCC                                                                                                                                                                                                                                                                                                                | This study                                           |
| 260bp-4xNBS gBlocks                                  | <u>GCCCAGGCCCTGGAGCGCATCTCCGGCTATTTCCCGG</u><br><u>GAAATAACGTTCTTGGACGGGTCTTTTCGACCTTCTGT</u><br><u>ATCGGCAAGTGATATTTCCCGGAAATATCCCCAATAT</u><br><u>TGTCACAGGCCGCTCACAGCTGCGGTGGGGGATTT</u><br><u>CCCGGAAATACCGATGAGTCACATCGACCCGCTCGC</u><br><u>CTGATTGGCGTATAGATCTATTTCCCGGAAATACTCG</u><br><u>AACCCAGGGCGTTTCGCATTGAGCGAGCGTCTTG</u> | This study                                           |
| AJ65                                                 | TAACTTTAAGAAGGAGATATACATATGTTGGGTGAAAA GGAGCAAGAACCG                                                                                                                                                                                                                                                                                    | This study                                           |
| AJ66                                                 | GGTGGTGCTCGAGTGCGGCCGCAAGCTTTTTTGAAT ACGGATTGTAAGCTG                                                                                                                                                                                                                                                                                    | This study                                           |
| AJ73                                                 | CTGAACCGCGCGCCACGCGCTTCTCCCGCAAT                                                                                                                                                                                                                                                                                                        | This study                                           |
| AJ74                                                 | ATTGCGGGGAGAACGCGCGTGGCGCGCGGTTTCAG                                                                                                                                                                                                                                                                                                     | This study                                           |
| AJ76                                                 | GGTGGTGCTCGAGTGCGGCCGCAAGCTTGTGCGGGG AAAAGGCTTTACGTTTAGG                                                                                                                                                                                                                                                                                | This study                                           |
| AJ81                                                 | TAACTTTAAGAAGGAGATATACATATGGAAGAGGTCCG TCACATCCCCGTCAA                                                                                                                                                                                                                                                                                  | This study                                           |
| AJ84                                                 | GATACCAATAAGGAATGCATTTTAGAAATTCCA                                                                                                                                                                                                                                                                                                       | This study                                           |
| AJ85                                                 | TGGAATTTCTAAAATGCATTCCTTATTGGTATC                                                                                                                                                                                                                                                                                                       | This study                                           |
| AJ86                                                 | GTGGCCTTAATTGAGTCTTTGCAACGCGAGGAG                                                                                                                                                                                                                                                                                                       | This study                                           |
| AJ87                                                 | CTCCTCGCGTTGCAAAGACTCAATTAAGGCCAC                                                                                                                                                                                                                                                                                                       | This study                                           |
| M13-F                                                | CGCCAGGGTTTTCCCAGTCACGAC                                                                                                                                                                                                                                                                                                                | Lab stock                                            |
| M13-R                                                | ATGGTCATAGCTGTTTCCT                                                                                                                                                                                                                                                                                                                     | Lab stock                                            |
| Noc(N121S)-F                                         | GTGGCGTTAATCGAAAGCTTGCAGCGGGAAGAA                                                                                                                                                                                                                                                                                                       | This study                                           |
| Noc(N121S)-R                                         | TTCTTCCCGCTGCAAGCTTTTCGATTAACGCCAC                                                                                                                                                                                                                                                                                                      | This study                                           |

The sequences of *parS*/*NBS* are underlined. The sequence of BamHI recognition site is bold.



**TABLE S3. X-ray data collection and processing statistics. Related to Figures 5 and 6.**

| Structure                                                                     | <i>G. thermoleovorans</i><br>NocΔCTD - iodide | <i>G. thermoleovorans</i><br>NocΔCTD - native | <i>G. thermoleovorans</i><br>NocNΔ26ΔCTD               |
|-------------------------------------------------------------------------------|-----------------------------------------------|-----------------------------------------------|--------------------------------------------------------|
| <i>Data collection</i>                                                        |                                               |                                               |                                                        |
| Diamond Light Source<br>beamline                                              | I04                                           | I04-1                                         | I04                                                    |
| Wavelength (Å)                                                                | 1.800                                         | 0.912                                         | 0.980                                                  |
| Detector                                                                      | Eiger2 XE 16M                                 | Pilatus 6M-F                                  | Eiger2 XE 16M                                          |
| Resolution range (Å)                                                          | 96.61 – 3.40 (3.67 –<br>3.40)                 | 84.89 – 2.50 (2.60 –<br>2.50)                 | 37.44 – 2.95 (3.13 –<br>2.95)                          |
| Space Group                                                                   | <i>P</i> 2 <sub>1</sub> 3                     | <i>P</i> 2 <sub>1</sub> 3                     | <i>C</i> 222 <sub>1</sub>                              |
| Cell parameters (Å/°)                                                         | <i>a</i> = <i>b</i> = <i>c</i> = 136.6        | <i>a</i> = <i>b</i> = <i>c</i> = 146.8        | <i>a</i> = 105.1, <i>b</i> = 106.6, <i>c</i><br>= 42.2 |
| Total no. of measured<br>intensities                                          | 2147484 (426036)                              | 1458851 (163435)                              | 66966 (10641)                                          |
| Unique reflections                                                            | 11990 (2445)                                  | 36704 (4119)                                  | 5285 (835)                                             |
| Multiplicity                                                                  | 179.1 (174.2)                                 | 39.7 (39.7)                                   | 12.6 (12.0)                                            |
| Mean <i>I</i> / $\sigma$ ( <i>I</i> )                                         | 15.9 (3.3)                                    | 28.5 (1.8)                                    | 5.5 (1.5)                                              |
| Completeness (%)                                                              | 100.0 (100.0)                                 | 100.0 (100.0)                                 | 100.0 (100.0)                                          |
| <i>R</i> <sub>merge</sub> <sup>a</sup>                                        | 0.500 (3.392)                                 | 0.091 (2.654)                                 | 0.281 (1.343)                                          |
| <i>R</i> <sub>meas</sub> <sup>b</sup>                                         | 0.501 (3.402)                                 | 0.093 (2.688)                                 | 0.293 (1.399)                                          |
| <i>CC</i> <sub>1/2</sub> <sup>c</sup>                                         | 0.999 (0.894)                                 | 1.000 (0.670)                                 | 0.997 (0.885)                                          |
| Wilson <i>B</i> value (Å <sup>2</sup> )                                       | 88.7                                          | 68.0                                          | 38.2                                                   |
| <i>Refinement</i>                                                             |                                               |                                               |                                                        |
| Resolution range (Å)                                                          | -                                             | 84.89 – 2.50 (2.57 –<br>2.50)                 | 37.44 – 2.95 (3.03 –<br>2.95)                          |
| Reflections: working/free <sup>d</sup>                                        | -                                             | 34843/1794                                    | 4752/522                                               |
| <i>R</i> <sub>work</sub> <sup>e</sup>                                         | -                                             | 0.210 (0.328)                                 | 0.267 (0.438)                                          |
| <i>R</i> <sub>free</sub> <sup>e</sup>                                         | -                                             | 0.240 (0.386)                                 | 0.288 (0.443)                                          |
| Ramachandran plot:<br>favored/allowed/disallowed <sup>f</sup><br>(%)          | -                                             | 98.1/1.9/0.0                                  | 98.0/2.0/0.0                                           |
| R.m.s. bond distance<br>deviation (Å)                                         | -                                             | 0.010                                         | 0.007                                                  |
| R.m.s. bond angle<br>deviation (°)                                            | -                                             | 1.55                                          | 1.33                                                   |
| Mean <i>B</i> factors:<br>protein/sulfate/water/<br>overall (Å <sup>2</sup> ) | -                                             | 85/118/71/86                                  | 74/70/0/74                                             |
| <b>PDB accession code</b>                                                     |                                               | <b>7NFU</b>                                   | <b>7NG0</b>                                            |

Values in parentheses are for the outer resolution shell.

$$^a R_{\text{merge}} = \frac{\sum_{hkl} \sum_i |I_i(hkl) - \langle I(hkl) \rangle|}{\sum_{hkl} \sum_i I_i(hkl)}$$

$$^b R_{\text{meas}} = \frac{\sum_{hkl} [N/(N-1)]^{1/2} \times \sum_i |I_i(hkl) - \langle I(hkl) \rangle|}{\sum_{hkl} \sum_i I_i(hkl)}, \text{ where } I_i(hkl) \text{ is the } i\text{th observation of reflection } hkl, \langle I(hkl) \rangle \text{ is the weighted average intensity for all observations } i \text{ of reflection } hkl \text{ and } N \text{ is the number of observations of reflection } hkl.$$

<sup>c</sup> *CC*<sub>1/2</sub> is the correlation coefficient between symmetry equivalent intensities from random halves of the dataset.

<sup>d</sup> The dataset was split into "working" and "free" sets consisting of 95 and 5% of the data respectively. The free set was not used for refinement.

<sup>e</sup> The R-factors *R*<sub>work</sub> and *R*<sub>free</sub> are calculated as follows:  $R = \frac{\sum (|F_{\text{obs}} - F_{\text{calc}}|)}{\sum |F_{\text{obs}}|}$ , where *F*<sub>obs</sub> and *F*<sub>calc</sub> are the observed and calculated structure factor amplitudes, respectively.

<sup>f</sup> As calculated using MolProbity (Williams et al., 2018)
